# Supplementary material
Source: publisher figshare collection journal article supplement (https://frontiersin.figshare.com/ndownloader/files/21257727)
Supplement: Supplementary file 1 [file 21257727]

## Sheet: Legend
DATA S6 - Results of generalised least square analyses on PDE Median with Number of fossil Collections as sampling variable
List of models used in the analyses	List of variables used in the analyses
lm0<-lm(PDE ~ 1 ) #null	SL: sea level
lm0s<-lm(PDE ~ 1 + Sampling)	δ18O: oxygene isotope
lm1<-lm(PDE ~ 1 + SL)	δ34S: sulfur isotope
lm1s<-lm(PDE ~ 1 + SL + Sampling)	δ13C: carbon isotope
lm2<-lm(PDE ~ 1 + δ18O)	Sr: Strontium isotope
lm2s<-lm(PDE ~ 1 + δ18O + Sampling)	Cont.Frag: continental fragmentation index
lm3<-lm(PDE ~ 1 + Sr)	Sampling: number of fossil collections
lm3s<-lm(PDE ~ 1 + Sr + Sampling)
lm4<-lm(PDE ~ 1 + δ34S)
lm4s<-lm(PDE ~ 1 + δ34S + Sampling)
lm5<-lm(PDE ~ 1 + SL + δ18O)	Legend for model ranking
lm5s<-lm(PDE ~ 1 + SL + δ18O + Sampling)	R2: generalized coefficient of determination
lm6<-lm(PDE ~ 1 + SL + Sr)	logLik: log-likelihood value of the model
lm6s<-lm(PDE ~ 1 + SL + Sr + Sampling)	AIC: Akaike’s information criterion
lm7<-lm(PDE ~ 1 + SL + δ34S)	AICc: Akaike’s information criterion for small sample sizes
lm7s<-lm(PDE ~ 1 + SL + δ34S + Sampling)	wAICc: conditional probabilities for each model
lm8<-lm(PDE ~ 1 + δ18O + Sr)	Δ(AICc): differences in AIC scores between a given candidate model and the one with the best fit
lm8s<-lm(PDE ~ 1 + δ18O + Sr + Sampling)	JB: p-value of the Jarque-Bera test against non-normality of the residuals
lm9<-lm(PDE ~ 1 + δ18O + δ34S)	BP: p-value of the Breusch-Pagan test against heteroscedasticity of the residuals
lm9s<-lm(PDE ~ 1 + δ18O + δ34S + Sampling)
lm10<-lm(PDE ~ 1 + Sr + δ34S)
lm10s<-lm(PDE ~ 1 + Sr + δ34S + Sampling)
lm11<-lm(PDE ~ 1 + SL + δ18O + Sr)	Legend for model parameters
lm11s<-lm(PDE ~ 1 + SL + δ18O + Sr + Sampling)	Std. Error: standard error of the estimate
lm12<-lm(PDE ~ 1 + SL + δ18O + δ34S)	p-value: significant at alpha = 0.05
lm12s<-lm(PDE ~ 1 + SL + δ18O + δ34S + Sampling)	Std. Error (HC) and p-value (HC): standard error and p-value computed using heteroskedasticity-consistent estimations of the variance-covariance matrix of coefficient estimates using the H3 type
lm13<-lm(PDE ~ 1 + δ18O + Sr + δ34S)
lm13s<-lm(PDE ~ 1 + δ18O + Sr + δ34S + Sampling)
lm14<-lm(PDE ~ 1 + SL + Sr + δ34S)
lm14s<-lm(PDE ~ 1 + SL + Sr + δ34S + Sampling)
lm15<-lm(PDE ~ 1 + SL + δ18O + Sr + δ34S)
lm15s<-lm(PDE ~ 1 + SL + δ18O + Sr + δ34S + Sampling)
lm16<-lm(PDE ~ 1 + δ13C)
lm16s<-lm(PDE ~ 1 + δ13C + Sampling)
lm17<-lm(PDE ~ 1 + SL + δ13C)
lm17s<-lm(PDE ~ 1 + SL + δ13C + Sampling)
lm18<-lm(PDE ~ 1 + δ18O + δ13C)
lm18s<-lm(PDE ~ 1 + δ18O + δ13C + Sampling)
lm19<-lm(PDE ~ 1 + Sr + δ13C)
lm19s<-lm(PDE ~ 1 + Sr + δ13C + Sampling)
lm20<-lm(PDE ~ 1 + δ34S + δ13C)
lm20s<-lm(PDE ~ 1 + δ34S + δ13C + Sampling)
lm21<-lm(PDE ~ 1 + SL + δ18O + δ13C)
lm21s<-lm(PDE ~ 1 + SL + δ18O + δ13C + Sampling)
lm22<-lm(PDE ~ 1 + SL + Sr + δ13C)
lm22s<-lm(PDE ~ 1 + SL + Sr + δ13C + Sampling)
lm23<-lm(PDE ~ 1 + SL + δ34S + δ13C)
lm23s<-lm(PDE ~ 1 + SL + δ34S + δ13C + Sampling)
lm24<-lm(PDE ~ 1 + δ18O + Sr + δ13C)
lm24s<-lm(PDE ~ 1 + δ18O + Sr + δ13C + Sampling)
lm25<-lm(PDE ~ 1 + δ18O + δ34S + δ13C)
lm25s<-lm(PDE ~ 1 + δ18O + δ34S + δ13C + Sampling)
lm26<-lm(PDE ~ 1 + Sr + δ34S + δ13C)
lm26s<-lm(PDE ~ 1 + Sr + δ34S + δ13C + Sampling)
lm27<-lm(PDE ~ 1 + SL + δ18O + Sr + δ13C)
lm27s<-lm(PDE ~ 1 + SL + δ18O + Sr + δ13C + Sampling)
lm28<-lm(PDE ~ 1 + SL + δ18O + δ34S + δ13C)
lm28s<-lm(PDE ~ 1 + SL + δ18O + δ34S + δ13C + Sampling)
lm29<-lm(PDE ~ 1 + SL + Sr + δ34S + δ13C)
lm29s<-lm(PDE ~ 1 + SL + Sr + δ34S + δ13C + Sampling)
lm30<-lm(PDE ~ 1 + δ18O + Sr + δ34S + δ13C)
lm30s<-lm(PDE ~ 1 + δ18O + Sr + δ34S + δ13C + Sampling)
lm31<-lm(PDE ~ 1 + SL + δ18O + δ34S + δ13C + Sr)
lm31s<-lm(PDE ~ 1 + SL + δ18O + δ34S + δ13C + Sr + Sampling)
lm32<-lm(PDE ~ 1 + Cont.Frag)
lm32s<-lm(PDE ~ 1 + Cont.Frag + Sampling)
lm33<-lm(PDE ~ 1 + SL + Cont.Frag + Sampling)
lm33s<-lm(PDE ~ 1 + SL + Cont.Frag)
lm34<-lm(PDE ~ 1 + δ18O + Cont.Frag)
lm34s<-lm(PDE ~ 1 + δ18O + Cont.Frag + Sampling)
lm35<-lm(PDE ~ 1 + Sr + Cont.Frag)
lm35s<-lm(PDE ~ 1 + Sr + Cont.Frag + Sampling)
lm36<-lm(PDE ~ 1 + δ34S + Cont.Frag)
lm36s<-lm(PDE ~ 1 + δ34S + Cont.Frag + Sampling)
lm37<-lm(PDE ~ 1 + SL + δ18O + Cont.Frag)
lm37s<-lm(PDE ~ 1 + SL + δ18O + Cont.Frag + Sampling)
lm38<-lm(PDE ~ 1 + SL + Sr + Cont.Frag)
lm38s<-lm(PDE ~ 1 + SL + Sr + Cont.Frag + Sampling)
lm39<-lm(PDE ~ 1 + SL + δ34S + Cont.Frag)
lm39s<-lm(PDE ~ 1 + SL + δ34S + Cont.Frag + Sampling)
lm40<-lm(PDE ~ 1 + δ18O + Sr + Cont.Frag)
lm40s<-lm(PDE ~ 1 + δ18O + Sr + Cont.Frag + Sampling)
lm41<-lm(PDE ~ 1 + δ18O + δ34S + Cont.Frag)
lm41s<-lm(PDE ~ 1 + δ18O + δ34S + Cont.Frag + Sampling)
lm42<-lm(PDE ~ 1 + Sr + δ34S + Cont.Frag)
lm42s<-lm(PDE ~ 1 + Sr + δ34S + Cont.Frag + Sampling)
lm43<-lm(PDE ~ 1 + SL + δ18O + Sr + Cont.Frag)
lm43s<-lm(PDE ~ 1 + SL + δ18O + Sr + Cont.Frag + Sampling)
lm44<-lm(PDE ~ 1 + SL + δ18O + δ34S + Cont.Frag)
lm44s<-lm(PDE ~ 1 + SL + δ18O + δ34S + Cont.Frag + Sampling)
lm45<-lm(PDE ~ 1 + δ18O + Sr + δ34S + Cont.Frag)
lm45s<-lm(PDE ~ 1 + δ18O + Sr + δ34S + Cont.Frag + Sampling)
lm46<-lm(PDE ~ 1 + SL + Sr + δ34S + Cont.Frag)
lm46s<-lm(PDE ~ 1 + SL + Sr + δ34S + Cont.Frag + Sampling)
lm47<-lm(PDE ~ 1 + SL + δ18O + Sr + δ34S + Cont.Frag)
lm47s<-lm(PDE ~ 1 + SL + δ18O + Sr + δ34S + Cont.Frag + Sampling)
lm48<-lm(PDE ~ 1 + δ13C + Cont.Frag)
lm48s<-lm(PDE ~ 1 + δ13C + Cont.Frag + Sampling)
lm49<-lm(PDE ~ 1 + SL + δ13C + Cont.Frag)
lm49s<-lm(PDE ~ 1 + SL + δ13C + Cont.Frag + Sampling)
lm50<-lm(PDE ~ 1 + δ18O + δ13C + Cont.Frag)
lm50s<-lm(PDE ~ 1 + δ18O + δ13C + Cont.Frag + Sampling)
lm51<-lm(PDE ~ 1 + Sr + δ13C + Cont.Frag)
lm51s<-lm(PDE ~ 1 + Sr + δ13C + Cont.Frag + Sampling)
lm52<-lm(PDE ~ 1 + δ34S + δ13C + Cont.Frag)
lm52s<-lm(PDE ~ 1 + δ34S + δ13C + Cont.Frag + Sampling)
lm53<-lm(PDE ~ 1 + SL + δ18O + δ13C + Cont.Frag)
lm53s<-lm(PDE ~ 1 + SL + δ18O + δ13C + Cont.Frag + Sampling)
lm54<-lm(PDE ~ 1 + SL + Sr + δ13C + Cont.Frag)
lm54s<-lm(PDE ~ 1 + SL + Sr + δ13C + Cont.Frag + Sampling)
lm55<-lm(PDE ~ 1 + SL + δ34S + δ13C + Cont.Frag)
lm55s<-lm(PDE ~ 1 + SL + δ34S + δ13C + Cont.Frag + Sampling)
lm56<-lm(PDE ~ 1 + δ18O + Sr + δ13C + Cont.Frag)
lm56s<-lm(PDE ~ 1 + δ18O + Sr + δ13C + Cont.Frag + Sampling)
lm57<-lm(PDE ~ 1 + δ18O + δ34S + δ13C + Cont.Frag)
lm57s<-lm(PDE ~ 1 + δ18O + δ34S + δ13C + Cont.Frag + Sampling)
lm58<-lm(PDE ~ 1 + Sr + δ34S + δ13C + Cont.Frag)
lm58s<-lm(PDE ~ 1 + Sr + δ34S + δ13C + Cont.Frag + Sampling)
lm59<-lm(PDE ~ 1 + SL + δ18O + Sr + δ13C + Cont.Frag)
lm59s<-lm(PDE ~ 1 + SL + δ18O + Sr + δ13C + Cont.Frag + Sampling)
lm60<-lm(PDE ~ 1 + SL + δ18O + δ34S + δ13C + Cont.Frag)
lm60s<-lm(PDE ~ 1 + SL + δ18O + δ34S + δ13C + Cont.Frag + Sampling)
lm61<-lm(PDE ~ 1 + SL + Sr + δ34S + δ13C + Cont.Frag)
lm61s<-lm(PDE ~ 1 + SL + Sr + δ34S + δ13C + Cont.Frag + Sampling)
lm62<-lm(PDE ~ 1 + δ18O + Sr + δ34S + δ13C + Cont.Frag)
lm62s<-lm(PDE ~ 1 + δ18O + Sr + δ34S + δ13C + Cont.Frag + Sampling)
lm63<-lm(PDE ~ 1 + SL + δ18O + δ34S + δ13C + Sr + Cont.Frag)
lm63s<-lm(PDE ~ 1 + SL + δ18O + δ34S + δ13C + Sr + Cont.Frag + Sampling)

## Sheet: PDE.MED.Elasmos
Elasmobranch PDE data: median
	R2	logLik	AIC	AICc	wAICc	Δ(AICc)	JB	BP
gls47.ar1	0.792339	-139.31	292.62	295.02	0.251231	0	0.505261	0.235727		Model: 47.ar1
gls63.ar1	0.805949	-137.887	291.773	295.067	0.245401	0.0469532	0.607256	0.0454311		Variable	Estimate	Std. Error	p-value
gls61.ar1	0.789941	-139.551	293.102	295.502	0.19742	0.482073	0.412842	0.0241505		(Intercept)	5582.12	6219.82	0.3754
gls46.ar1	0.771256	-141.341	294.682	296.348	0.129337	1.3279	0.417332	0.114938		Sea level	0.914	0.336	0.0099
gls62.ar1	0.77736	-140.773	295.545	297.945	0.0581957	2.92512	0.261986	0.0869946		δ18O	-2.008	3.188	0.5329
gls45.ar1	0.758107	-142.514	297.029	298.696	0.0399928	3.67534	0.401086	0.0813179		87Sr/89Sr	-8197.16	8810.92	0.3584
gls58.ar1	0.752341	-143.009	298.018	299.685	0.0243852	4.66479	0.356013	0.114259		δ34S	3.144	1.164	0.0105
gls59.ar1	0.762773	-142.105	298.211	300.611	0.0153497	5.59055	0.549171	0.106108		Cont. Frag.	590.737	84.687	0
gls42.ar1	0.728734	-144.921	299.842	300.923	0.013129	5.9031	0.39247	0.077491
gls54.ar1	0.740533	-143.987	299.974	301.641	0.00916987	6.6209	0.529644	0.0500625
gls43.ar1	0.739297	-144.087	300.174	301.841	0.00829884	6.82051	0.506387	0.128436		Model: 63.ar1
gls38.ar1	0.709631	-146.35	302.7	303.782	0.00314465	8.76134	0.533696	0.156634		Variable	Estimate	Std. Error	p-value	Std. Error (HC)	p-value (HC)
gls56.ar1	0.71641	-145.854	303.708	305.375	0.00141769	10.3547	0.301184	0.241564		(Intercept)	6468.91	6224.47	0.3058	9741.47	0.33727
gls40.ar1	0.691481	-147.624	305.247	306.328	0.000880264	11.3078	0.367988	0.145919		Sea level	0.909	0.35	0.0136	0.44326	0.04035
gls51.ar1	0.684254	-148.11	306.219	307.3	0.000541315	12.2803	0.346272	0.221731		δ18O	-2.473	3.454	0.4789	6.12448	0.6864
gls47s.ar1	0.737007	-144.271	304.541	307.836	0.000414245	12.8153	0.533815	0.522754		δ34S	3.276	1.345	0.0201	2.21009	0.13826
gls63s.ar1	0.75215	-143.025	304.051	308.414	0.000310151	13.3941	0.626943	0.260662		δ13C	-0.785	2.647	0.7686	6.73939	0.90732
gls35.ar1	0.65235	-150.131	308.262	308.894	0.000244038	13.8736	0.370534	0.173239		87Sr/89Sr	-9456.13	88.21.228	0.2911	9552.31	0.32221
gls61s.ar1	0.730115	-144.814	305.628	308.922	0.000240627	13.9018	0.404711	0.336992		Cont. Frag.	597.502	85.738	0	94.897	3.048e-10
gls46s.ar1	0.708239	-146.451	306.901	309.301	0.00019905	14.2811	0.430659	0.626834
gls62s.ar1	0.725899	-145.139	306.279	309.573	0.000173768	14.5528	0.288607	0.329289
gls45s.ar1	0.705375	-146.656	307.312	309.712	0.000162131	14.6914	0.367528	0.200063		Model: 61.ar1
gls58s.ar1	0.695971	-147.316	308.631	311.031	8.38186e-05	16.0109	0.323213	0.438296		Variable	Estimate	Std. Error	p-value	Std. Error (HC)	p-value (HC)
gls42s.ar1	0.671565	-148.937	309.874	311.541	6.49601e-05	16.5207	0.354961	0.152587		(Intercept)	6111.17	6428.05	0.3481	6509	0.34779
gls59s.ar1	0.704469	-146.72	309.44	312.735	3.57633e-05	17.7144	0.484259	0.232059		Sea level	0.919	0.338	0.0101	0.43674	0.03534
gls43s.ar1	0.680274	-148.373	310.745	313.146	2.91217e-05	18.1253	0.472221	0.206121		87Sr/89Sr	-8941.38	9109.37	0.3329	9241.8	0.3333
gls44.ar1	0.656822	-149.859	311.719	313.385	2.58326e-05	18.365	0.544084	0.156069		δ34S	3.199	1.295	0.0184	1.6723	0.05578
gls54s.ar1	0.675693	-148.672	311.343	313.743	2.15999e-05	18.7229	0.425448	0.233249		δ13C	-0.043	2.41	0.9859	3.6242	0.99059
gls55.ar1	0.6527	-150.11	312.22	313.887	2.01033e-05	18.8665	0.504494	0.00267785		Cont. Frag.	588.254	87.225	0	96.282	9.983e-10
gls60.ar1	0.672002	-148.909	311.818	314.218	1.70317e-05	19.1981	0.800348	0.0173246
gls38s.ar1	0.644495	-150.6	313.201	314.867	1.23116e-05	19.8472	0.440847	0.401436
gls39.ar1	0.621384	-151.923	313.846	314.927	1.19498e-05	19.9068	0.500885	0.028349		Model: 46.ar1
gls56s.ar1	0.663318	-149.458	312.916	315.316	9.83817e-06	20.2957	0.269387	0.425933		Variable	Estimate	Std. Error	p-value
gls40s.ar1	0.638292	-150.964	313.927	315.594	8.56162e-06	20.5737	0.305163	0.240117		(Intercept)	6078.31	6125.41	0.3275
gls51s.ar1	0.625947	-151.668	315.337	317.003	4.23146e-06	21.9832	0.271357	0.4135		Sea level	0.92	0.33	0.0084
gls35s.ar1	0.597078	-153.23	316.459	317.54	3.23506e-06	22.5202	0.309348	0.125427		87Sr/89Sr	-8894.68	8678.52	0.3121
gls41.ar1	0.595595	-153.307	316.614	317.695	2.99492e-06	22.6744	0.334694	0.0458814		δ34S	3.189	1.144	0.0083
gls53.ar1	0.616821	-152.175	316.349	318.016	2.55059e-06	22.9956	0.577688	0.0515595		Cont. Frag.	587.992	84.927	0
gls49.ar1	0.587837	-153.706	317.412	318.493	2.00951e-06	23.4725	0.517911	0.00781252
gls37.ar1	0.581449	-154.029	318.058	319.139	1.45483e-06	24.1185	0.490865	0.0764305
gls57.ar1	0.602159	-152.963	317.926	319.593	1.15928e-06	24.5727	0.276888	0.0228195
gls52.ar1	0.568323	-154.677	319.354	320.436	7.6068e-07	25.4153	0.333156	0.238211
gls33s.ar1	0.537754	-156.114	320.228	320.86	6.15317e-07	25.8395	0.517367	0.0424878
gls36.ar1	0.534363	-156.268	320.535	321.167	5.27758e-07	26.1465	0.353434	0.577057
gls34.ar1	0.511896	-157.257	322.514	323.146	1.96191e-07	28.1256	0.335465	0.0476526
gls48.ar1	0.504083	-157.591	323.181	323.813	1.40553e-07	28.7926	0.311822	0.0999626
gls50.ar1	0.532037	-156.372	322.744	323.825	1.39664e-07	28.8053	0.267649	0.0258141
gls32.ar1	0.451933	-159.69	325.381	325.688	5.50233e-08	30.6683	0.327777	0.726811
gls44s.ar1	0.563299	-154.92	323.841	326.24	4.17522e-08	31.2203	0.560114	0.341325
gls8.ar1	0.465326	-159.171	326.342	326.973	2.89443e-08	31.953	0.357361	0.000482977
gls10.ar1	0.462287	-159.29	326.58	327.211	2.5697e-08	32.191	0.566684	0.287763
gls60s.ar1	0.577025	-154.25	324.499	327.793	1.92086e-08	32.7731	0.758881	0.117873
gls55s.ar1	0.545942	-155.739	325.478	327.877	1.84162e-08	32.8573	0.412067	0.0940131
gls13.ar1	0.483369	-158.45	326.9	327.981	1.74878e-08	32.9608	0.362492	0.00387297
gls39s.ar1	0.510756	-157.306	326.612	328.279	1.50677e-08	33.2587	0.436926	0.379762
gls41s.ar1	0.510156	-157.332	326.664	328.33	1.46849e-08	33.3101	0.336761	0.0234584
gls53s.ar1	0.520911	-156.866	327.731	330.131	5.96772e-09	35.111	0.528137	0.142505
gls37s.ar1	0.48774	-158.272	328.543	330.21	5.73837e-09	35.1894	0.494909	0.161804
gls3.ar1	0.387962	-162.009	330.017	330.325	5.41647e-09	35.3049	0.511799	0.274757
gls49s.ar1	0.483414	-158.448	328.896	330.563	4.80934e-09	35.5426	0.413119	0.134445
gls57s.ar1	0.508663	-157.396	328.792	331.192	3.51213e-09	36.1713	0.277329	0.0870143
gls36s.ar1	0.440632	-160.119	330.238	331.319	3.2952e-09	36.2988	0.271278	0.13441
gls33.ar1	0.433107	-160.4	330.799	331.88	2.48888e-09	36.8601	0.436223	0.383636
gls34s.ar1	0.432061	-160.438	330.877	331.958	2.39437e-09	36.9375	0.359993	0.0260531
gls52s.ar1	0.463935	-159.225	330.451	332.117	2.21065e-09	37.0972	0.224525	0.508139
gls48s.ar1	0.407998	-161.31	332.62	333.701	1.00172e-09	38.6803	0.21068	0.536483
gls50s.ar1	0.441228	-160.097	332.193	333.86	9.2503e-10	38.8396	0.264361	0.0652876
gls32s.ar1	0.366218	-162.742	333.484	334.115	8.14133e-10	39.095	0.254136	0.2258
gls30.ar1	0.426848	-160.63	333.26	334.927	5.4252e-10	39.9068	0.152462	0.0030395
gls19.ar1	0.315301	-164.365	336.729	337.361	1.60673e-10	42.3405	0.0683121	0.0315572
gls31.ar1	0.429742	-160.524	335.048	337.448	1.5383e-10	42.4276	0.744804	0.0296425
gls24.ar1	0.348664	-163.316	336.631	337.712	1.34782e-10	42.692	0.207069	0.000729244
gls26.ar1	0.345231	-163.426	336.852	337.933	1.20692e-10	42.9128	0.144525	0.0120437
gls29.ar1	0.379786	-162.287	336.575	338.241	1.03443e-10	43.2212	0.637357	0.0122173
gls8s.ar1	0.328414	-163.958	337.917	338.998	7.08597e-11	43.9779	0.432019	0.00276625
gls27.ar1	0.366581	-162.73	337.46	339.126	6.64615e-11	44.106	0.554084	0.0153432
gls10s.ar1	0.320347	-164.209	338.418	339.5	5.51438e-11	44.4794	0.669505	0.122938
gls14.ar1	0.318669	-164.261	338.522	339.603	5.23607e-11	44.583	0.481813	0.0178186
gls15.ar1	0.347324	-163.359	338.717	340.384	3.54345e-11	45.3639	0.80303	0.0269716
gls3s.ar1	0.261328	-165.958	339.916	340.548	3.26554e-11	45.5273	0.587155	0.164757
gls22.ar1	0.300231	-164.822	339.644	340.725	2.98869e-11	45.7044	0.598928	0.0203371
gls13s.ar1	0.300093	-164.826	341.652	343.319	8.1701e-12	48.2983	0.498409	0.0165019
gls11.ar1	0.245372	-166.407	342.813	343.895	6.12548e-12	48.8744	0.581139	0.0105265
gls2.ar1	0.145521	-169.016	344.033	344.34	4.90148e-12	49.3202	0.252514	2.90788e-05
gls6.ar1	0.191327	-167.859	343.719	344.35	4.87753e-12	49.33	0.540626	0.0135053
gls4.ar1	0.141124	-169.124	344.248	344.556	4.40071e-12	49.5357	0.595555	0.204637
gls9.ar1	0.153823	-168.811	345.623	346.254	1.88257e-12	51.234	0.358892	0.00134549
gls0.ar1	NA	-172.319	348.638	348.738	5.43819e-13	53.7176	0.213745	NA
gls31s.ar1	0.277983	-165.479	346.958	350.252	2.55033e-13	55.232	0.725571	0.0553034
gls30s.ar1	0.222885	-167.023	348.047	350.447	2.31395e-13	55.4265	0.189722	0.0111001
gls25.ar1	0.111701	-169.832	349.663	350.744	1.99431e-13	55.7239	0.148732	0.00130448
gls24s.ar1	0.1536	-168.817	349.634	351.3	1.51006e-13	56.2801	0.217454	0.0033531
gls29s.ar1	0.205672	-167.483	348.967	351.367	1.46065e-13	56.3467	0.636985	0.0390279
gls19s.ar1	0.0892404	-170.356	350.712	351.793	1.18046e-13	56.7726	0.0874401	0.0587084
gls27s.ar1	0.195385	-167.754	349.507	351.907	1.1148e-13	56.8871	0.547845	0.0340124
gls15s.ar1	0.173502	-168.317	350.634	353.034	6.34545e-14	58.0141	0.780131	0.0511943
gls14s.ar1	0.112164	-169.821	351.641	353.308	5.53471e-14	58.2875	0.497978	0.0717661
gls26s.ar1	0.107471	-169.931	351.863	353.529	4.95464e-14	58.509	0.218268	0.0189727
gls22s.ar1	0.104691	-169.997	351.993	353.66	4.64139e-14	58.6396	0.59825	0.0696758
gls20.ar1	-0.0180448	-172.695	353.389	354.021	3.87552e-14	59.0003	0.168827	0.00479656
gls4s.ar1	-0.07368	-173.812	355.624	356.255	1.26783e-14	61.235	0.689073	0.0771551
gls2s.ar1	-0.0782198	-173.9	355.801	356.432	1.16033e-14	61.4122	0.315581	0.000328732
gls11s.ar1	0.0423267	-171.411	354.821	356.488	1.12853e-14	61.4678	0.558334	0.0265833
gls28.ar1	0.0328873	-171.617	355.233	356.9	9.1846e-15	61.8797	0.616028	0.0197877
gls6s.ar1	-0.0469229	-173.282	356.564	357.645	6.32883e-15	62.6246	0.535418	0.0868285
gls23.ar1	-0.0706658	-173.753	357.506	358.587	3.95184e-15	63.5664	0.590209	0.0148111
gls7.ar1	-0.151299	-175.278	358.555	359.187	2.92741e-15	64.1665	0.492477	0.0167826
gls12.ar1	-0.0969246	-174.262	358.523	359.604	2.37585e-15	64.5841	0.671083	0.0189335
gls0s.ar1	-0.241679	-176.865	359.729	360.037	1.91364e-15	65.0168	0.303762	0.0553064
gls21.ar1	-0.115796	-174.62	359.24	360.321	1.66056e-15	65.3005	0.407789	0.0130815
gls16.ar1	-0.261027	-177.189	360.379	360.686	1.38309e-15	65.6661	0.031488	0.0268708
gls9s.ar1	-0.138927	-175.051	360.101	361.183	1.07925e-15	66.1623	0.480345	0.00839651
gls18.ar1	-0.214822	-176.405	360.811	361.442	9.47698e-16	66.4222	0.235479	0.000154981
gls5.ar1	-0.270317	-177.344	362.687	363.319	3.7092e-16	68.2983	0.320791	0.0552539
gls17.ar1	-0.279987	-177.503	363.005	363.637	3.16311e-16	68.6168	0.303344	0.406886
gls25s.ar1	-0.18905	-175.955	363.91	365.577	1.19916e-16	70.5567	0.171177	0.00615135
gls1.ar1	-0.429122	-179.817	365.634	365.942	9.99083e-17	70.9218	0.345494	0.3649
gls20s.ar1	-0.349445	-178.613	367.225	368.306	3.06389e-17	73.2858	0.235903	0.00884742
gls28s.ar1	-0.219036	-176.478	366.956	369.356	1.81215e-17	74.3361	0.609872	0.034245
gls23s.ar1	-0.359659	-178.771	369.542	371.208	7.1788e-18	76.188	0.581193	0.0315887
gls12s.ar1	-0.382262	-179.117	370.234	371.901	5.07783e-18	76.8805	0.66578	0.0333606
gls7s.ar1	-0.483174	-180.597	371.193	372.275	4.2121e-18	77.2544	0.487773	0.0459404
gls21s.ar1	-0.410433	-179.541	371.082	372.748	3.32411e-18	77.7279	0.412798	0.0292187
gls18s.ar1	-0.589489	-182.051	374.101	375.182	9.84288e-19	80.162	0.254581	0.000994252
gls5s.ar1	-0.608669	-182.302	374.605	375.686	7.65123e-19	80.6657	0.315345	0.111356
gls17s.ar1	-0.615127	-182.387	374.773	375.854	7.03384e-19	80.834	0.300773	0.603293
gls16s.ar1	-0.759132	-184.18	376.36	376.992	3.98262e-19	81.9716	0.0543636	0.0429987
gls1s.ar1	-0.817628	-184.867	377.734	378.366	2.00369e-19	83.3455	0.328942	0.789587

## Sheet: PDE.MED.Marine Actinops
Marine Actinopterygian PDE data: median
	R2	logLik	AIC	AICc	wAICc	Δ(AICc)	JB	BP
gls63.ar1	0.986088	-49.7366	115.473	126.673	0.500189	0	0.289266	0.351972		Model: 63.ar1
gls47.ar1	0.979803	-53.0916	120.183	127.82	0.281983	1.14628	0.328244	0.349043		Variable	Estimate	Std. Error	p-value
gls59.ar1	0.977204	-54.181	122.362	129.998	0.0948642	3.32508	0.191462	0.131762		(Intercept)	-22296.3	58499	0.7104
gls62.ar1	0.97593	-54.6706	123.341	130.978	0.0581368	4.30437	0.0746902	0.328259		Sea level	4.35	1.58	0.0186
gls43.ar1	0.965967	-57.7879	127.576	132.576	0.0261461	5.90257	0.328026	0.0649986		δ18O	-37.569	13.12	0.0154
gls45.ar1	0.964789	-58.094	128.188	133.188	0.019252	6.51474	0.063874	0.275555		δ34S	10.084	6.39	0.1427
gls56.ar1	0.958973	-59.47	130.94	135.94	0.00486268	9.26679	0.000443788	0.405459		δ13C	-2.986	9.56	0.7605
gls61.ar1	0.968182	-57.1821	128.364	136.001	0.00471764	9.32735	0.000953736	0.310192		87Sr/89Sr	31467.7	82904.2	0.7115
gls31.ar1	0.964361	-58.203	130.406	138.042	0.00169973	11.369	0.0671606	0.545056		Cont. Frag.	-675.139	475.9	0.1837
gls46.ar1	0.953747	-60.5491	133.098	138.098	0.00165296	11.4248	0.00399822	0.170395
gls54.ar1	0.953331	-60.6296	133.259	138.259	0.00152497	11.586	0.00053353	0.225455
gls40.ar1	0.93886	-63.0604	136.121	139.198	0.000953862	12.5244	0.00167254	0.349026		Model: 47.ar1
gls58.ar1	0.948617	-61.4957	134.991	139.991	0.000641415	13.3181	3.28453e-11	0.781569		Variable	Estimate	Std. Error	p-value
gls27.ar1	0.947806	-61.6367	135.273	140.273	0.000557092	13.6	0.205874	0.570489		(Intercept)	-30203.7	51078	0.5653
gls30.ar1	0.945296	-62.0592	136.119	141.119	0.000365086	14.4452	0.0100081	0.404271		Sea level	4.23	1.53	0.0169
gls38.ar1	0.931371	-64.1003	138.201	141.278	0.000337186	14.6042	0.00198857	0.0982577		δ18O	-38.34	12.64	0.0104
gls47s.ar1	0.968306	-57.1469	130.294	141.494	0.000302619	14.8205	0.387141	0.684355		87Sr/89Sr	42678.5	72378.9	0.5664
gls63s.ar1	0.978086	-53.8259	125.652	141.652	0.000279625	14.9786	0.376085	0.578197		δ34S	10.45	6.18	0.1165
gls15.ar1	0.941942	-62.5949	137.19	142.19	0.000213688	15.5165	0.0349654	0.345129		Cont. Frag.	-739.55	409.03	0.0957
gls59s.ar1	0.966903	-57.537	131.074	142.274	0.000204874	15.6007	0.282094	0.385834
gls29.ar1	0.941016	-62.7373	137.475	142.475	0.000185313	15.8014	0.36752	0.275322
gls42.ar1	0.923542	-65.0726	140.145	143.222	0.000127531	16.5488	2.75859e-08	0.702811		Model: 59.ar1
gls51.ar1	0.922712	-65.1698	140.339	143.416	0.000115718	16.7432	4.35207e-13	0.787459		Variable	Estimate	Std. Error	p-value
gls62s.ar1	0.964371	-58.2004	132.401	143.601	0.000105531	16.9275	0.215766	0.503517		(Intercept)	-2010.4	62196.8	0.9747
gls13.ar1	0.92098	-65.3692	140.738	143.815	9.47944e-05	17.1421	0.00829121	0.283009		Sea level	4.8594	1.66	0.0128
gls43s.ar1	0.950866	-61.0929	136.186	143.822	9.44681e-05	17.149	0.371878	0.30707		δ18O	-32.7619	13.84	0.0356
gls22.ar1	0.917725	-65.7325	141.465	144.542	6.5918e-05	17.8687	0.552315	0.140864		87Sr/89Sr	2846.68	88162	0.9748
gls45s.ar1	0.947851	-61.6288	137.257	144.894	5.52811e-05	18.2206	0.1738	0.433637		δ13C	-5.6352	10.52	0.6019
gls11.ar1	0.915568	-65.9654	141.931	145.008	5.22219e-05	18.3345	0.107316	0.368398		Cont. Frag.	-417.696	496.16	0.4163
gls14.ar1	0.913498	-66.1834	142.367	145.444	4.1993e-05	18.7705	0.299893	0.172749
gls60.ar1	0.945472	-62.0303	138.06	145.697	3.70002e-05	19.0236	0.225287	0.389054
gls24.ar1	0.907801	-66.7575	143.515	146.592	2.3652e-05	19.9186	0.0113499	0.502842
gls56s.ar1	0.942372	-62.528	139.056	146.692	2.24919e-05	20.0192	0.0251859	0.63557
gls35.ar1	0.883206	-68.8856	145.771	147.486	1.51289e-05	20.8123	8.33712e-10	0.675001
gls6.ar1	0.879589	-69.1601	146.32	148.035	1.14973e-05	21.3613	0.476157	0.0737965
gls44.ar1	0.919521	-65.5339	143.068	148.068	1.13079e-05	21.3945	0.271134	0.219419
gls61s.ar1	0.953108	-60.6726	137.345	148.545	8.90664e-06	21.8719	0.02628	0.238201
gls40s.ar1	0.914484	-66.0802	144.16	149.16	6.54827e-06	22.4871	0.0320428	0.588771
gls54s.ar1	0.932363	-63.9693	141.939	149.575	5.32224e-06	22.9017	0.0208289	0.191435
gls8.ar1	0.868402	-69.9596	147.919	149.634	5.16853e-06	22.9603	0.0121276	0.328959
gls53.ar1	0.911557	-66.3832	144.766	149.766	4.83661e-06	23.0931	0.316473	0.231043
gls46s.ar1	0.931554	-64.0763	142.153	149.789	4.78201e-06	23.1158	0.0794814	0.135652
gls26.ar1	0.883057	-68.8971	147.794	150.871	2.7839e-06	24.1978	0.000607402	0.708972
gls57.ar1	0.903561	-67.1621	146.324	151.324	2.21951e-06	24.6509	0.0218972	0.323649
gls58s.ar1	0.925353	-64.8569	143.714	151.35	2.19095e-06	24.6768	2.16979e-07	0.502653
gls31s.ar1	0.944053	-62.2616	140.523	151.723	1.81813e-06	25.0499	0.083821	0.851077
gls38s.ar1	0.900828	-67.4136	146.827	151.827	1.72596e-06	25.1539	0.0616915	0.100139
gls27s.ar1	0.919708	-65.5129	145.026	152.662	1.13689e-06	25.9889	0.137422	0.942604
gls55.ar1	0.895208	-67.9097	147.819	152.819	1.05095e-06	26.1461	0.163573	0.0939408
gls30s.ar1	0.918384	-65.6602	145.32	152.957	9.81225e-07	26.2834	0.0282987	0.671666
gls37.ar1	0.867262	-70.0373	150.075	153.151	8.90161e-07	26.4782	0.285361	0.108961
gls10.ar1	0.834771	-72.0079	152.016	153.73	6.66535e-07	27.0568	0.000634603	0.623441
gls51s.ar1	0.889485	-68.3882	148.776	153.776	6.51247e-07	27.1032	3.02535e-08	0.463465
gls42s.ar1	0.888475	-68.4702	148.94	153.94	6.00025e-07	27.267	2.16796e-05	0.402
gls41.ar1	0.860667	-70.4737	150.947	154.024	5.75355e-07	27.351	0.023957	0.210208
gls39.ar1	0.854385	-70.8706	151.741	154.818	3.86864e-07	28.1448	0.178832	0.0471067
gls29s.ar1	0.909278	-66.612	147.224	154.861	3.78758e-07	28.1872	0.705953	0.268266
gls15s.ar1	0.909165	-66.6233	147.247	154.883	3.74513e-07	28.2097	0.0525774	0.63139
gls13s.ar1	0.8822	-68.9627	149.925	154.925	3.66641e-07	28.2522	0.0218859	0.554711
gls49.ar1	0.848466	-71.2292	152.458	155.535	2.7029e-07	28.862	0.138734	0.0343046
gls22s.ar1	0.87399	-69.5691	151.138	156.138	1.99938e-07	29.465	0.69511	0.219931
gls24s.ar1	0.871458	-69.7482	151.496	156.496	1.67158e-07	29.8231	0.0324771	0.786377
gls19.ar1	0.806085	-73.4487	154.897	156.612	1.57798e-07	29.9384	0.000114855	0.474096
gls11s.ar1	0.870004	-69.8494	151.699	156.699	1.51068e-07	30.0255	0.0840958	0.764411
gls50.ar1	0.836488	-71.9139	153.828	156.905	1.3629e-07	30.2314	0.00222834	0.481377
gls35s.ar1	0.833414	-72.0815	154.163	157.24	1.15257e-07	30.5667	4.78945e-06	0.348506
gls14s.ar1	0.8658	-70.1359	152.272	157.272	1.13438e-07	30.5985	0.669479	0.190609
gls33s.ar1	0.788712	-74.2209	156.442	158.156	7.29008e-08	31.4828	0.151379	0.013342
gls8s.ar1	0.816875	-72.9334	155.867	158.944	4.91675e-08	32.2705	0.0268005	0.708008
gls6s.ar1	0.813953	-73.0759	156.152	159.229	4.26397e-08	32.5554	0.708158	0.141983
gls3.ar1	0.735149	-76.2544	158.509	159.309	4.09661e-08	32.6355	2.06655e-05	0.91931
gls60s.ar1	0.914551	-66.0732	148.146	159.346	4.02028e-08	32.6731	0.235052	0.593441
gls28.ar1	0.849068	-71.1933	154.387	159.387	3.94015e-08	32.7134	0.0345009	0.398039
gls25.ar1	0.802433	-73.6166	157.233	160.31	2.48308e-08	33.6368	0.0100387	0.279094
gls34.ar1	0.761397	-75.3151	158.63	160.345	2.44079e-08	33.6712	0.0022498	0.325006
gls52.ar1	0.800174	-73.7189	157.438	160.515	2.24154e-08	33.8415	0.000342652	0.610807
gls44s.ar1	0.872813	-69.6528	153.306	160.942	1.81037e-08	34.2688	0.344778	0.380127
gls53s.ar1	0.868302	-69.9665	153.933	161.569	1.32299e-08	34.896	0.205804	0.673346
gls26s.ar1	0.828105	-72.3638	156.728	161.728	1.22225e-08	35.0544	0.0326505	0.289516
gls21.ar1	0.784341	-74.4052	158.81	161.887	1.12851e-08	35.214	0.152869	0.360793
gls57s.ar1	0.855566	-70.7973	155.595	163.231	5.7642e-09	36.5577	0.0409389	0.470497
gls9.ar1	0.715403	-76.9016	161.803	163.517	4.99494e-09	36.8441	0.0082491	0.165559
gls12.ar1	0.763791	-75.2244	160.449	163.526	4.97445e-09	36.8524	0.0148022	0.247923
gls36.ar1	0.711404	-77.0272	162.054	163.769	4.40543e-09	37.0953	0.000116111	0.468238
gls37s.ar1	0.801849	-73.6432	159.286	164.286	3.40064e-09	37.6131	0.227832	0.405713
gls10s.ar1	0.752722	-75.6365	161.273	164.35	3.29421e-09	37.6767	0.0509638	0.157593
gls23.ar1	0.744849	-75.9186	161.837	164.914	2.48452e-09	38.2408	0.0262625	0.111542
gls41s.ar1	0.79064	-74.1384	160.277	165.277	2.07244e-09	38.6035	0.0457662	0.35349
gls48.ar1	0.684919	-77.8174	163.635	165.349	1.99895e-09	38.6757	2.83208e-05	0.476947
gls55s.ar1	0.832764	-72.1166	158.233	165.869	1.54095e-09	39.1962	0.66309	0.0838393
gls19s.ar1	0.728113	-76.4904	162.981	166.058	1.40256e-09	39.3844	0.0264607	0.233318
gls5.ar1	0.663594	-78.4068	164.814	166.528	1.10873e-09	39.8546	0.0755818	0.208865
gls18.ar1	0.658983	-78.5293	165.059	166.773	9.80898e-10	40.0996	0.00767843	0.358376
gls50s.ar1	0.768288	-75.0514	162.103	167.103	8.31748e-10	40.4294	0.00871264	0.695905
gls49s.ar1	0.762586	-75.2701	162.54	167.54	6.68307e-10	40.867	0.616454	0.053897
gls7.ar1	0.643265	-78.9348	165.87	167.584	6.53866e-10	40.9107	0.0364174	0.0507883
gls39s.ar1	0.760917	-75.3332	162.666	167.666	6.27483e-10	40.9931	0.662506	0.0453193
gls17.ar1	0.641124	-78.9887	165.977	167.692	6.19596e-10	41.0184	0.0456647	0.0480261
gls3s.ar1	0.612107	-79.6885	167.377	169.091	3.07747e-10	42.4179	0.0277973	0.141043
gls32.ar1	0.542473	-81.1744	168.349	169.149	2.9901e-10	42.4755	1.08044e-05	0.303146
gls34s.ar1	0.661738	-78.4563	166.913	169.989	1.96398e-10	43.3162	0.00774495	0.584555
gls33.ar1	0.660516	-78.4887	166.977	170.054	1.90129e-10	43.3811	0.616135	0.0257016
gls2.ar1	0.518615	-81.6319	169.264	170.064	1.89234e-10	43.3905	0.0131784	0.134768
gls20.ar1	0.577494	-80.4577	168.915	170.63	1.42597e-10	43.9565	0.000540002	0.432299
gls1.ar1	0.4977	-82.0147	170.029	170.829	1.29052e-10	44.1561	0.0578966	0.0137171
gls28s.ar1	0.776498	-74.7267	163.453	171.09	1.13299e-10	44.4164	0.063419	0.805377
gls25s.ar1	0.705438	-77.2113	166.423	171.423	9.59272e-11	44.7493	0.0294424	0.532087
gls52s.ar1	0.700351	-77.3654	166.731	171.731	8.22267e-11	45.0575	0.038761	0.249903
gls21s.ar1	0.68844	-77.7162	167.432	172.432	5.78974e-11	45.7592	0.12574	0.899361
gls9s.ar1	0.577174	-80.4646	170.929	174.006	2.63608e-11	47.3327	0.0221329	0.418252
gls4.ar1	0.395553	-83.6807	173.361	174.161	2.43898e-11	47.4882	0.000493104	0.26225
gls12s.ar1	0.649758	-78.7695	169.539	174.539	2.01937e-11	47.8658	0.0379657	0.613452
gls36s.ar1	0.560214	-80.8185	171.637	174.714	1.85031e-11	48.0406	0.0316394	0.141701
gls48s.ar1	0.547739	-81.0702	172.141	175.217	1.43851e-11	48.5441	0.0177385	0.220484
gls18s.ar1	0.516253	-81.676	173.352	176.429	7.84964e-12	49.7556	0.0293804	0.532998
gls5s.ar1	0.512393	-81.7475	173.495	176.572	7.30782e-12	49.8986	0.0818069	0.715415
gls23s.ar1	0.603055	-79.8961	171.792	176.792	6.54569e-12	50.1189	0.483194	0.086491
gls16.ar1	0.291969	-85.1043	176.209	177.009	5.87443e-12	50.3353	0.00012143	0.225921
gls32s.ar1	0.336463	-84.5202	177.04	178.755	2.45368e-12	52.0813	0.0155156	0.105447
gls17s.ar1	0.446883	-82.882	175.764	178.841	2.34999e-12	52.1677	0.504594	0.0457899
gls2s.ar1	0.31917	-84.7517	177.503	179.218	1.94652e-12	52.5444	0.051528	0.353988
gls7s.ar1	0.425858	-83.2178	176.436	179.512	1.67976e-12	52.8392	0.46994	0.0481407
gls0.ar1	NA	-88.2117	180.423	180.673	9.40069e-13	54.0001	1.93187e-05	NA
gls20s.ar1	0.365487	-84.1176	178.235	181.312	6.83047e-13	54.6389	0.0611813	0.161717
gls1s.ar1	0.201615	-86.1852	180.37	182.085	4.6419e-13	55.4114	0.490291	0.0205941
gls4s.ar1	0.0847108	-87.415	182.83	184.544	1.357e-13	57.8711	0.0720047	0.0645571
gls16s.ar1	-0.00829822	-88.2861	184.572	186.286	5.67942e-14	59.6131	0.0254895	0.122758
gls0s.ar1	-0.455802	-91.5917	189.183	189.983	8.94363e-15	63.3101	0.0196456	0.049952

## Sheet: PDE.MED.Freshwater Actinops
Freshwater Actinopterygian PDE data: median
	R2	logLik	AIC	AICc	wAICc	Δ(AICc)	JB	BP	BP
gls40.ar1	0.902803	-45.3261	100.652	103.729	0.579024	0	lm40	0.133804	0.190861		Model: 40.ar1
gls35.ar1	0.869791	-47.9577	103.915	105.63	0.223872	1.90054	lm35	0.0540988	0.34612		Variable	Estimate	Std. Error	p-value
gls43.ar1	0.907025	-44.9264	101.853	106.853	0.121453	3.12364	lm43	0.103091	0.328587		(Intercept)	-28671.3	19829.1	0.1702
gls38.ar1	0.875644	-47.5438	105.088	108.165	0.0630344	4.43533	lm38	0.04026	0.512633		δ18O	2.48	4.859	0.6171
gls8.ar1	0.808677	-51.4211	110.842	112.556	0.00701227	8.82737	lm8	0.362791	0.10886		87Sr/89Sr	40685.2	28102.6	0.1697
gls3.ar1	0.740646	-54.1592	114.318	115.118	0.00194788	11.3892	lm3	0.00317719	0.964134		Cont. Frag.	-106.44	133.725	0.4394
gls40s.ar1	0.848478	-49.322	110.644	115.644	0.00149768	11.9149	lm40s	0.0200721	0.269606
gls35s.ar1	0.798162	-51.9026	113.805	116.882	0.000806396	13.153	lm35s	0.0208431	0.591049
gls11.ar1	0.796565	-51.9736	113.947	117.024	0.000751185	13.2949	lm11	0.114882	0.258516		Model: 35.ar1
gls43s.ar1	0.856436	-48.8364	111.673	119.309	0.00023962	15.5801	lm43s	0.0146689	0.429717		Variable	Estimate	Std. Error	p-value
gls38s.ar1	0.808396	-51.4343	114.869	119.869	0.000181155	16.1395	lm38s	0.0143411	0.726596		(Intercept)	-34896.4	15217	0.0367
gls6.ar1	0.703449	-55.3654	118.731	120.445	0.000135792	16.7159	lm6	0.005601	0.788781		87Sr/89Sr	49508.9	21564.3	0.0365
gls8s.ar1	0.689432	-55.7811	121.562	124.639	1.6679e-05	20.9099	lm8s	0.315783	0.187766		Cont. Frag.	-150.36	99.759	0.1525
gls34.ar1	0.618459	-57.6334	123.267	124.981	1.4057e-05	21.252	lm34	0.580851	0.118125
gls3s.ar1	0.586771	-58.3515	124.703	126.417	6.85565e-06	22.6881	lm3s	0.00157137	0.885667
gls37.ar1	0.620664	-57.5812	125.162	128.239	2.75656e-06	24.5102	lm37	0.407654	0.205874		Model: 43.ar1
gls32.ar1	0.448504	-60.9492	127.898	128.698	2.19136e-06	24.9691	lm32	0.0228112	0.253498		Variable	Estimate	Std. Error	p-value
gls11s.ar1	0.669189	-56.3494	124.699	129.699	1.32886e-06	25.9695	lm11s	0.0503433	0.369391		(Intercept)	-29552.3	20014.9	0.1636
gls33s.ar1	0.443566	-61.0294	130.059	131.773	4.71024e-07	28.0439	lm33s	0.0120574	0.627733		Sea level	0.45	0.609	0.4698
gls6s.ar1	0.526114	-59.5841	129.168	132.245	3.71978e-07	28.516	lm6s	0.00125905	0.917745		δ18O	2.34	4.954	0.6452
gls2.ar1	0.286269	-63.27	132.54	133.34	2.15171e-07	29.6108	lm2	0.456802	0.0814614		87Sr/89Sr	41940.8	28365.7	0.1631
gls5.ar1	0.364367	-62.227	132.454	134.168	1.42204e-07	30.4392	lm5	0.6177	0.141777		Cont. Frag.	-172.95	157.034	0.2907
gls0.ar1	NA	-66.3052	136.611	136.861	3.70103e-08	33.1313	lm0	0.0341625	NA
gls34s.ar1	0.383714	-61.9488	133.898	136.975	3.49573e-08	33.2454	lm34s	0.514336	0.213501
gls1.ar1	0.0440484	-65.8998	137.8	138.6	1.55122e-08	34.8704	lm1	0.0379224	0.282377
gls32s.ar1	0.132572	-65.0252	138.05	139.765	8.66297e-09	36.0356	lm32s	0.00740694	0.481613
gls37s.ar1	0.390243	-61.853	135.706	140.706	5.41105e-09	36.9768	lm37s	0.349134	0.330284
gls33.ar1	0.130947	-65.0421	140.084	143.161	1.5855e-09	39.4319	lm33	0.00344353	0.787849
gls2s.ar1	-0.139177	-67.478	142.956	144.67	7.45499e-10	40.9411	lm2s	0.357328	0.157137
gls5s.ar1	-0.0397064	-66.6557	143.311	146.388	3.1578e-10	42.6591	lm5s	0.486813	0.236156
gls0s.ar1	-0.557797	-70.2947	146.589	147.389	1.91426e-10	43.6602	lm0s	0.00710777	0.604301
gls1s.ar1	-0.532675	-70.1484	148.297	150.011	5.16081e-11	46.2819	lm1s	0.00867655	0.555972
